# Supplementary material for: Design, Synthesis and Biological Evaluation of Stilbene Derivatives as Novel Inhibitors of Protein Tyrosine Phosphatase 1B
Source: PubMed Central journal article supplement (PMC6274251; doi:10.3390/molecules21121722), 2016-12-16
Supplement: molecules-21-01722-s001.pdf [file molecules-21-01722-s001.pdf]

# Supplementary Materials: Design, Synthesis and Biological Evaluation of Stilbene Derivatives as Novel Inhibitors of Protein Tyrosine Phosphatase 1B

Haibing He, Yinghua Ge, Hong Dai, Song Cui, Fei Ye, Jia Jin and Yujun Shi

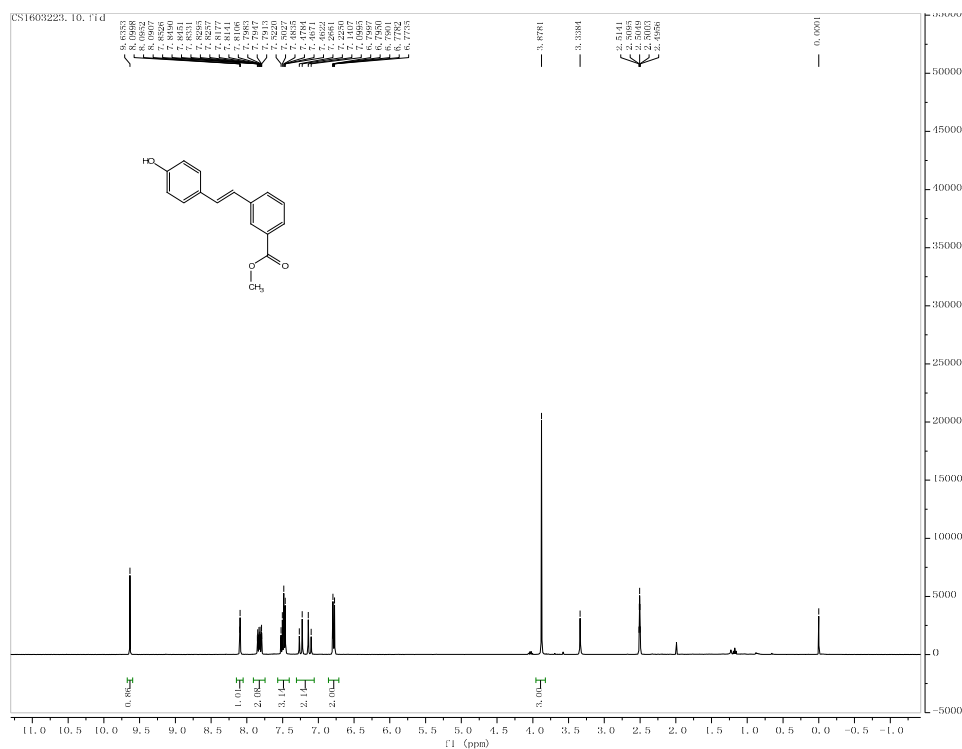

Figure S1.  $^1\text{H-NMR}$  spectrum of compound 14.

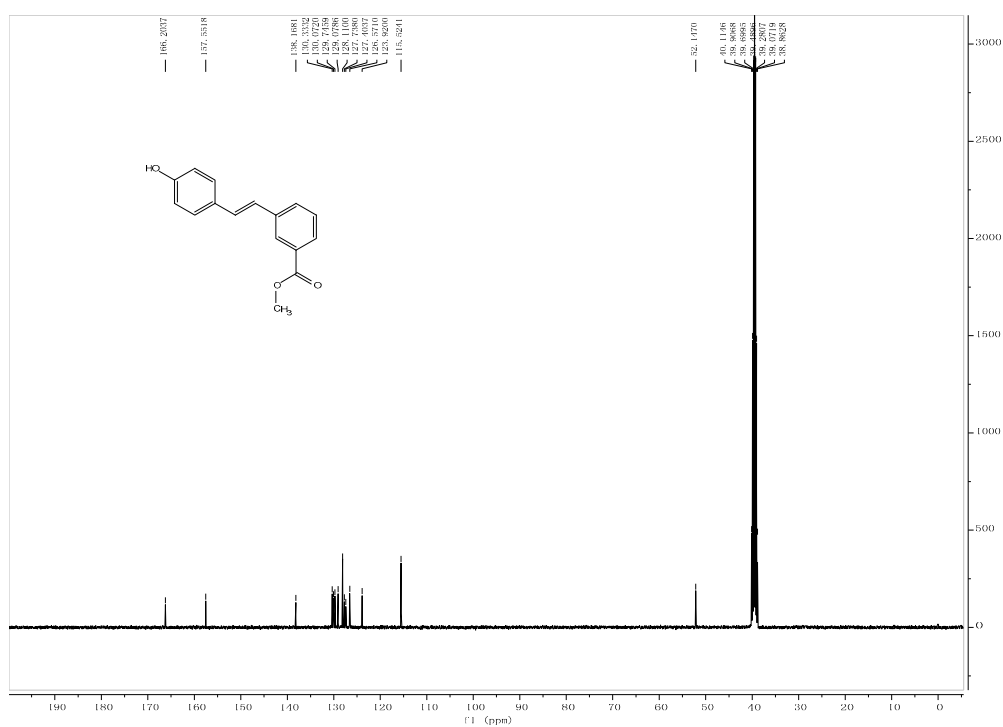

Figure S2.  $^{13}\text{C-NMR}$  spectrum of compound 14.

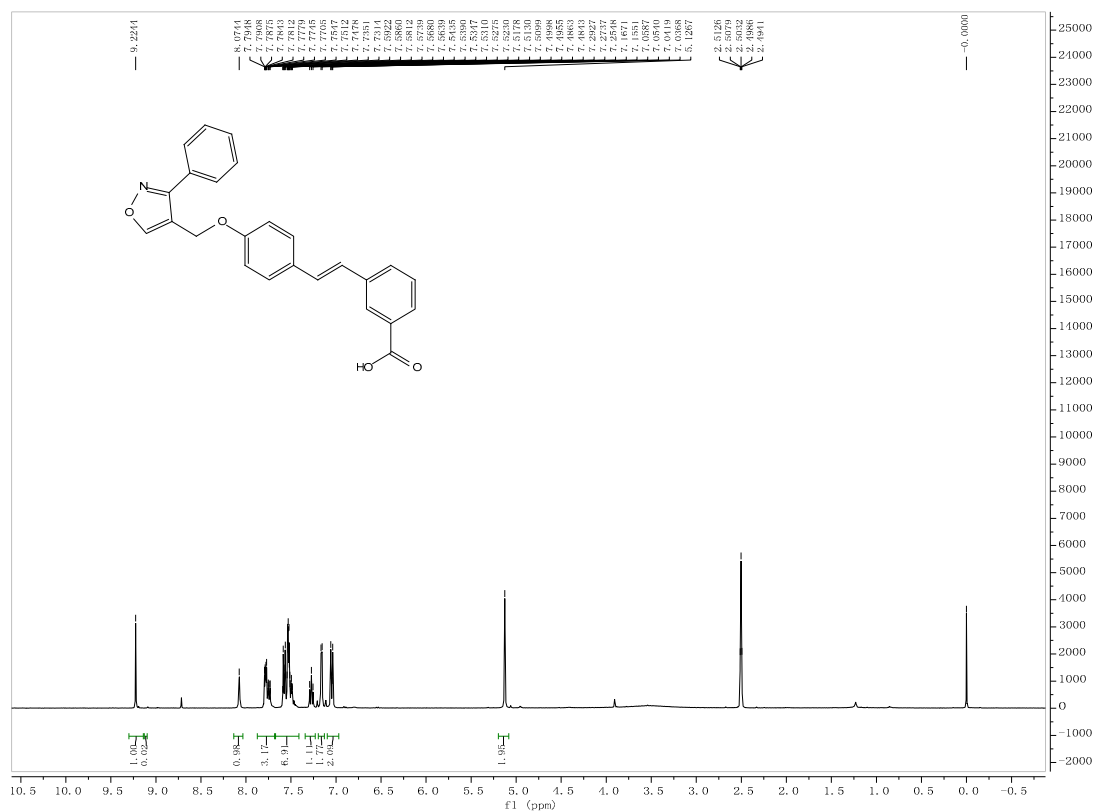Figure S3. <sup>1</sup>H-NMR spectrum of compound 15.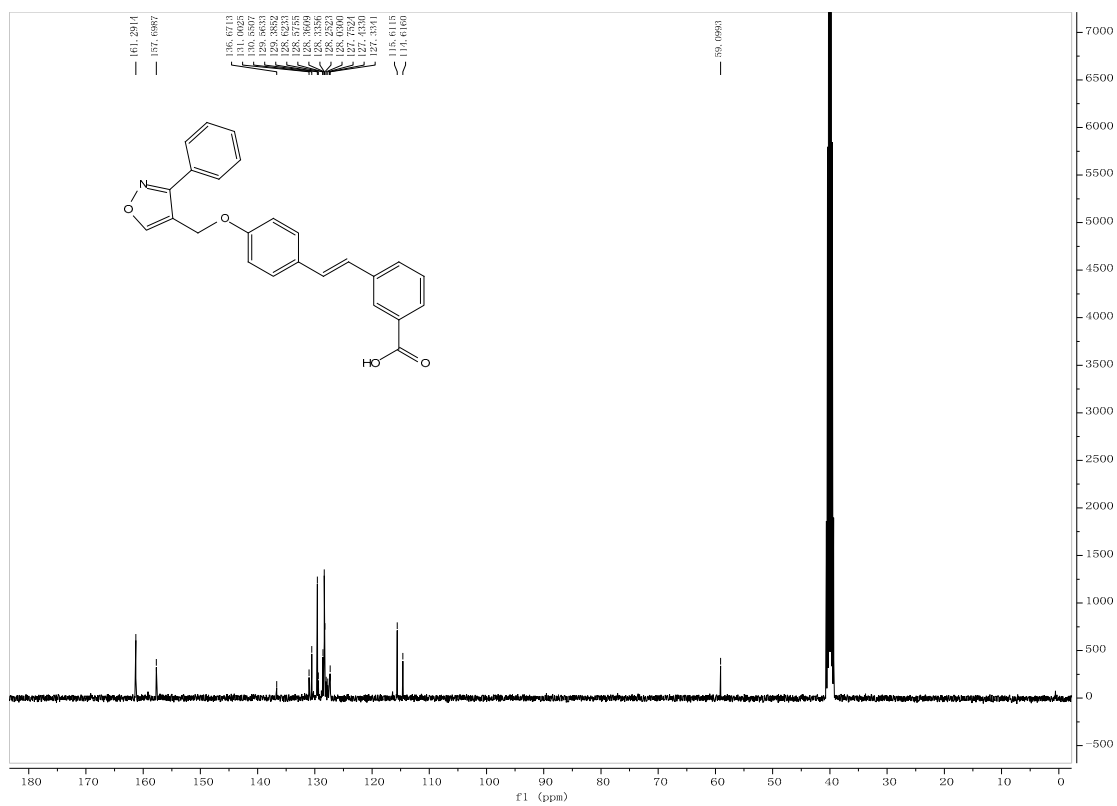Figure S4. <sup>13</sup>C-NMR spectrum of compound 15.

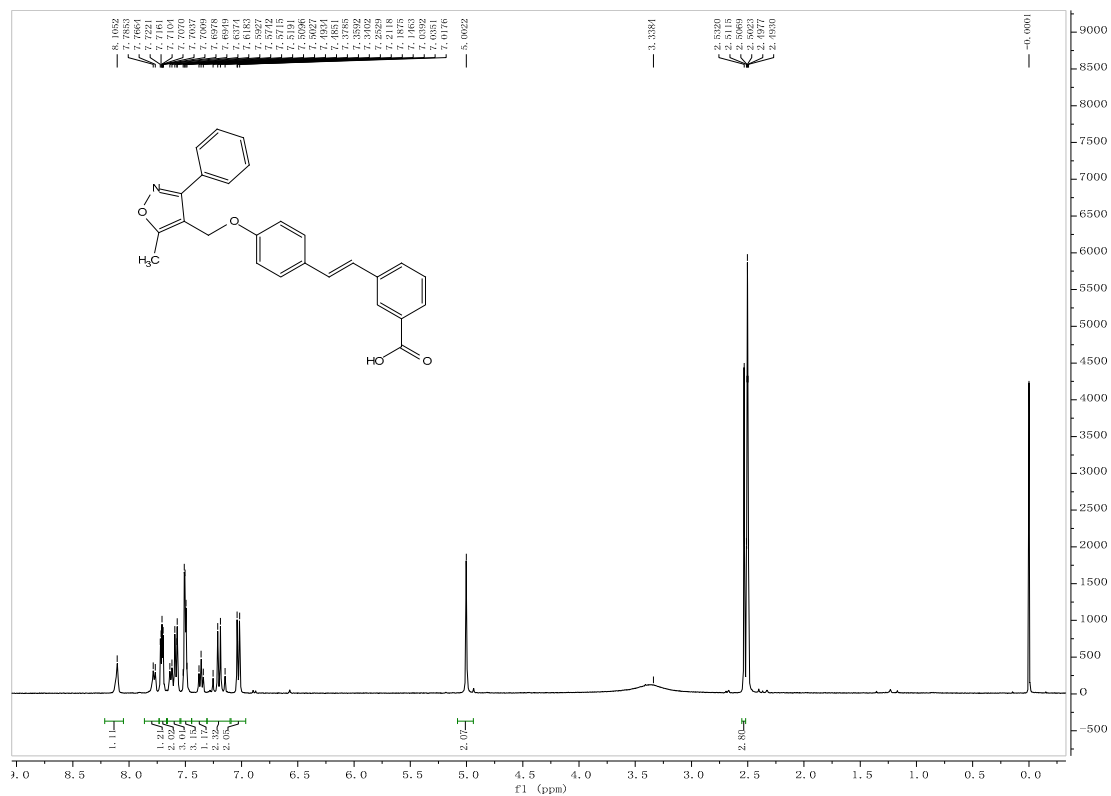Figure S5. <sup>1</sup>H-NMR spectrum of compound 17.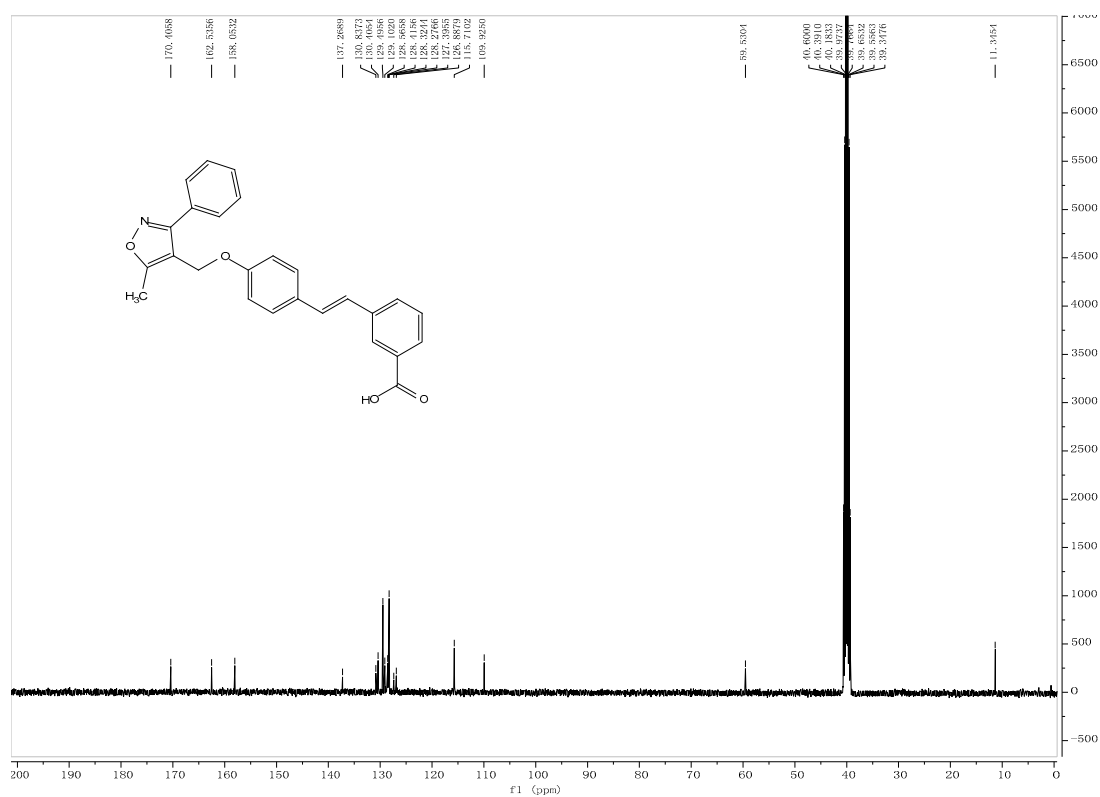Figure S6. <sup>13</sup>C-NMR spectrum of compound 17.

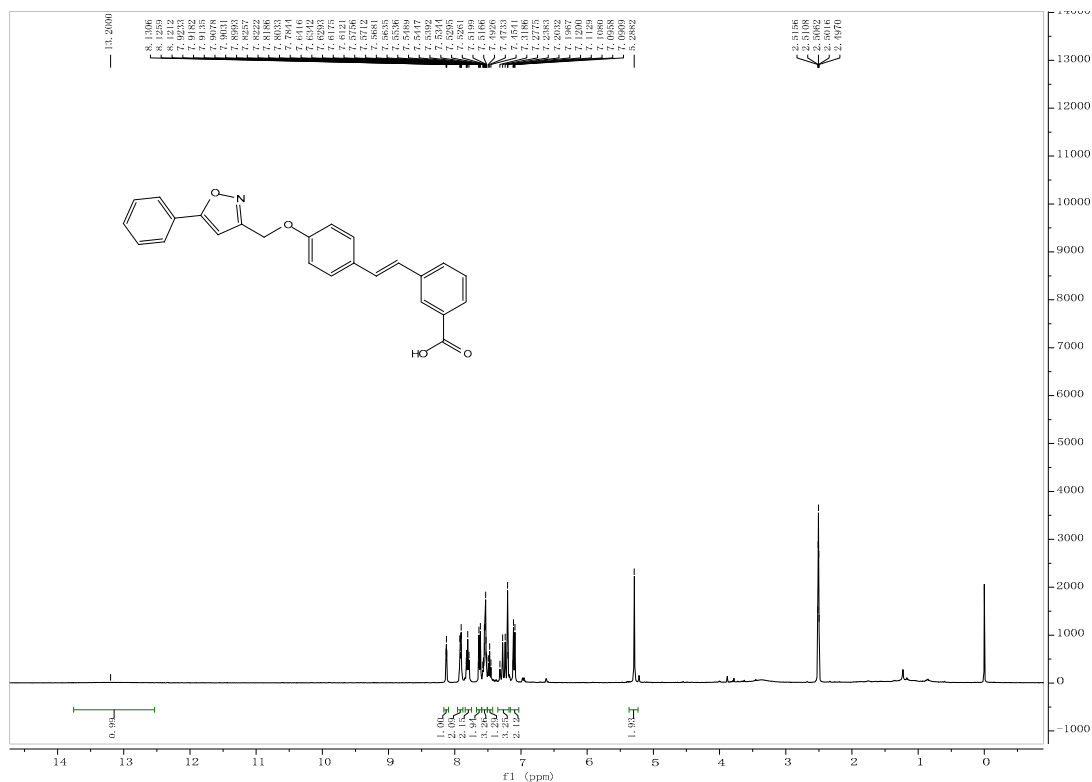

Figure S7. <sup>1</sup>H-NMR spectrum of compound 18.

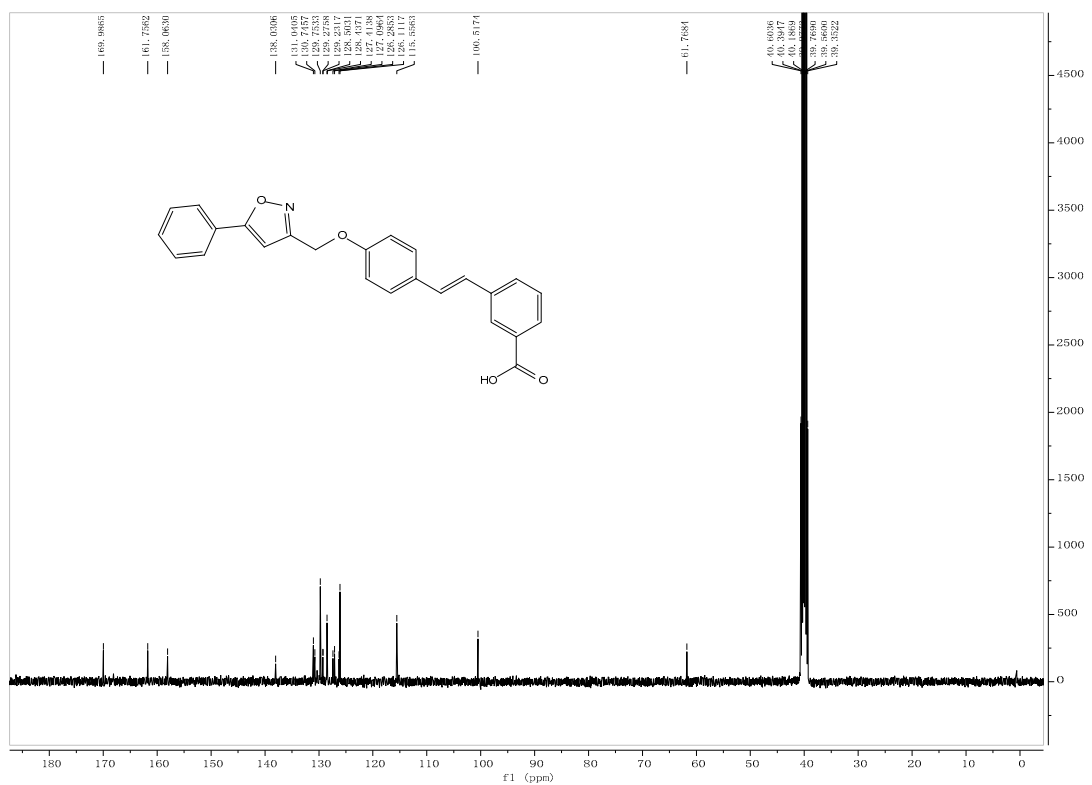

Figure S8. <sup>13</sup>C-NMR spectrum of compound 18.

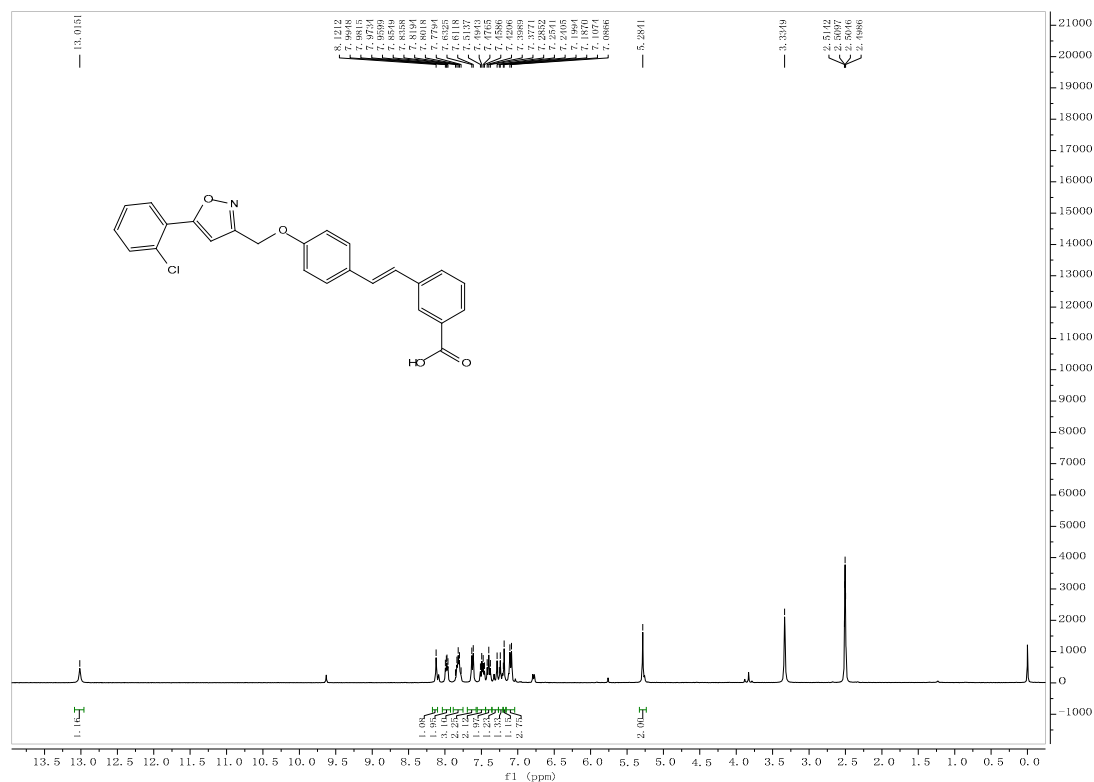Figure S9. <sup>1</sup>H-NMR spectrum of compound 19.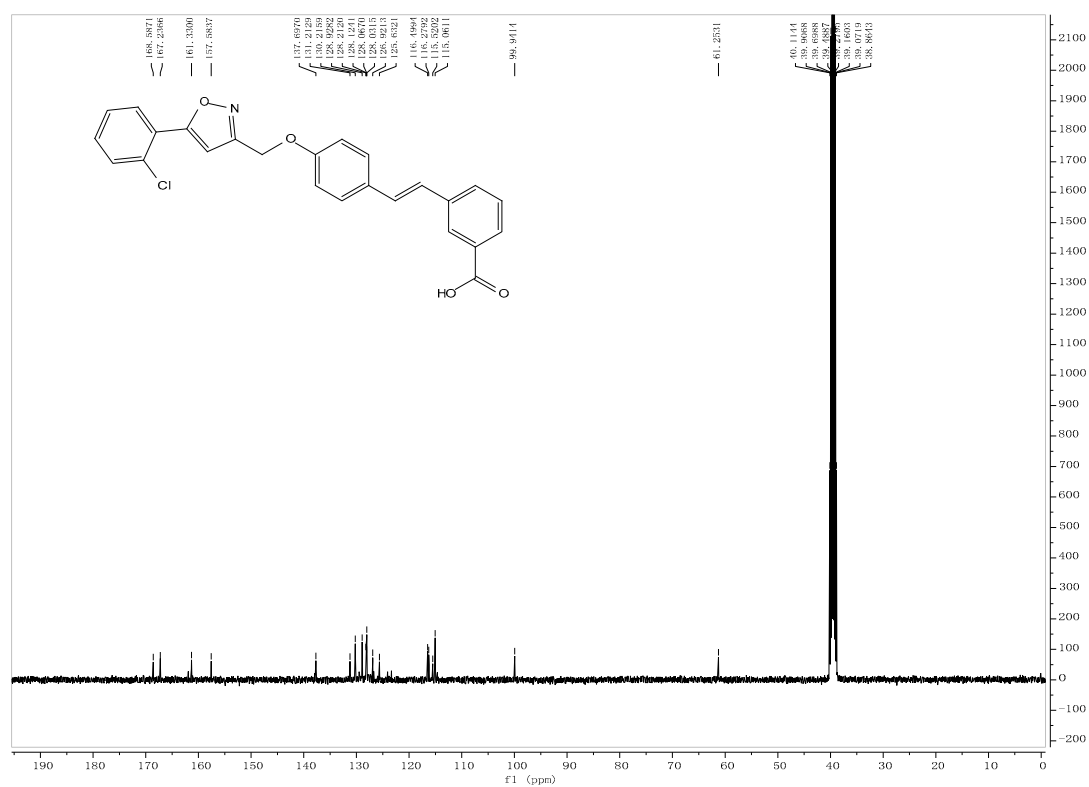Figure S10. <sup>13</sup>C-NMR spectrum of compound 19.

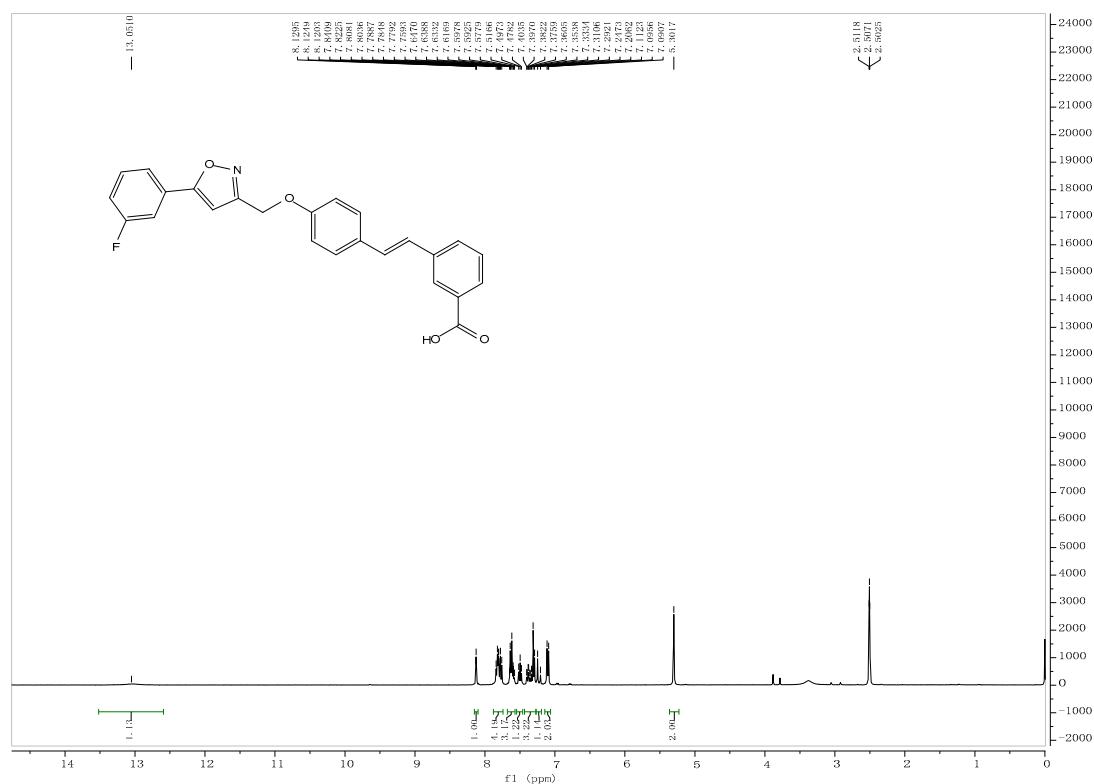Figure S11. <sup>1</sup>H-NMR spectrum of compound 22.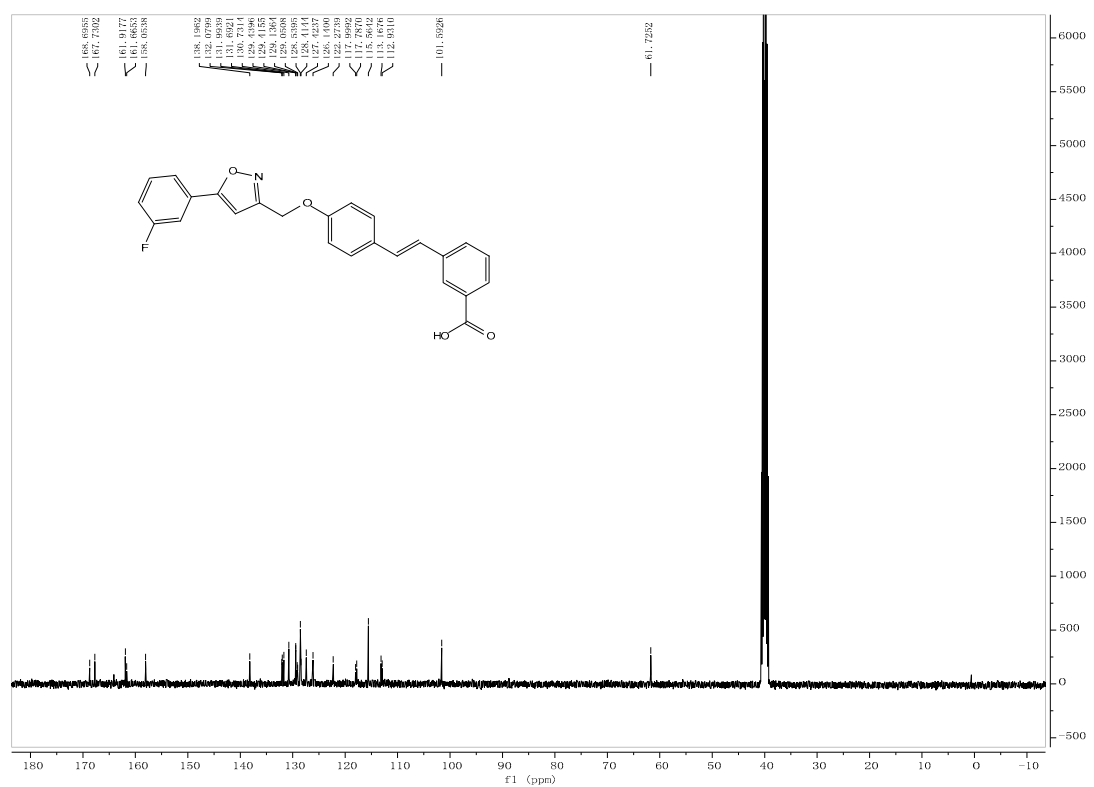Figure S12. <sup>13</sup>C-NMR spectrum of compound 22.

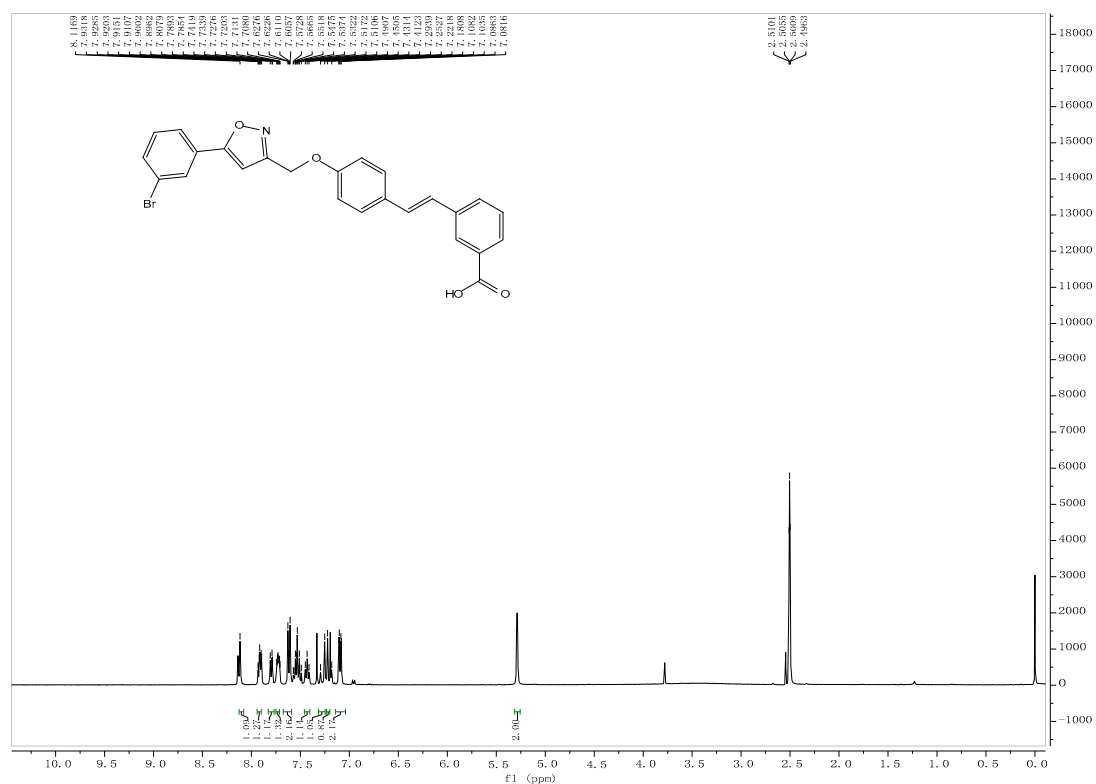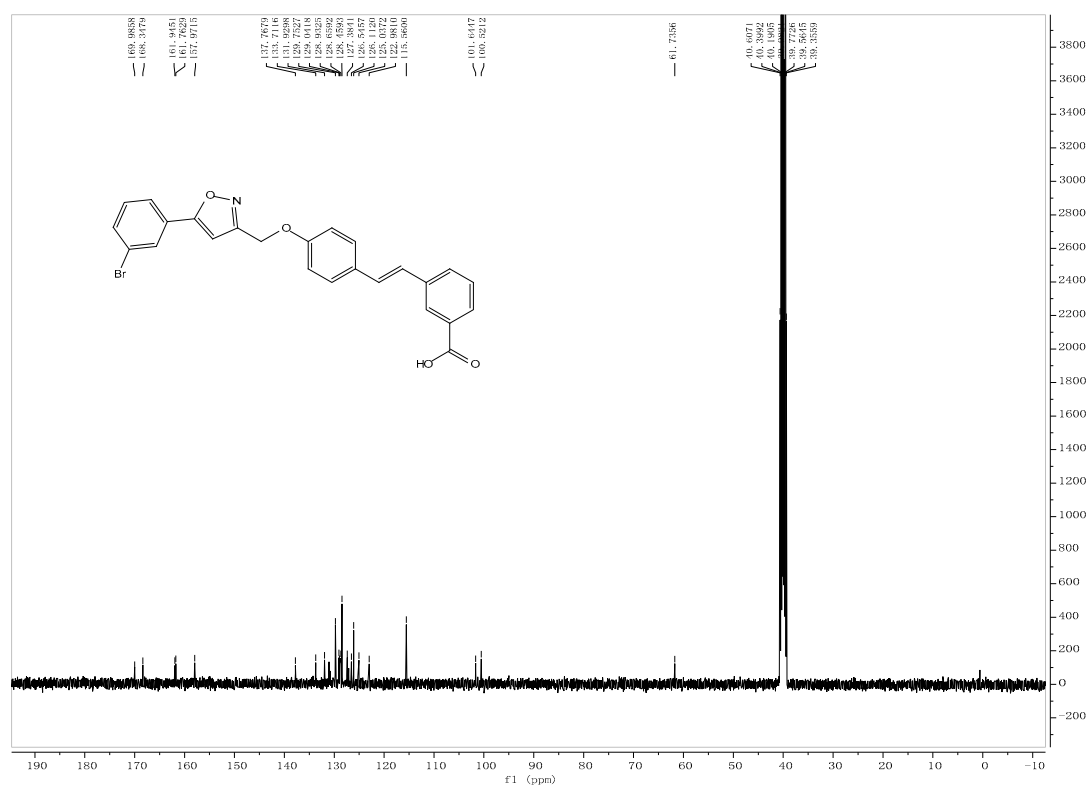

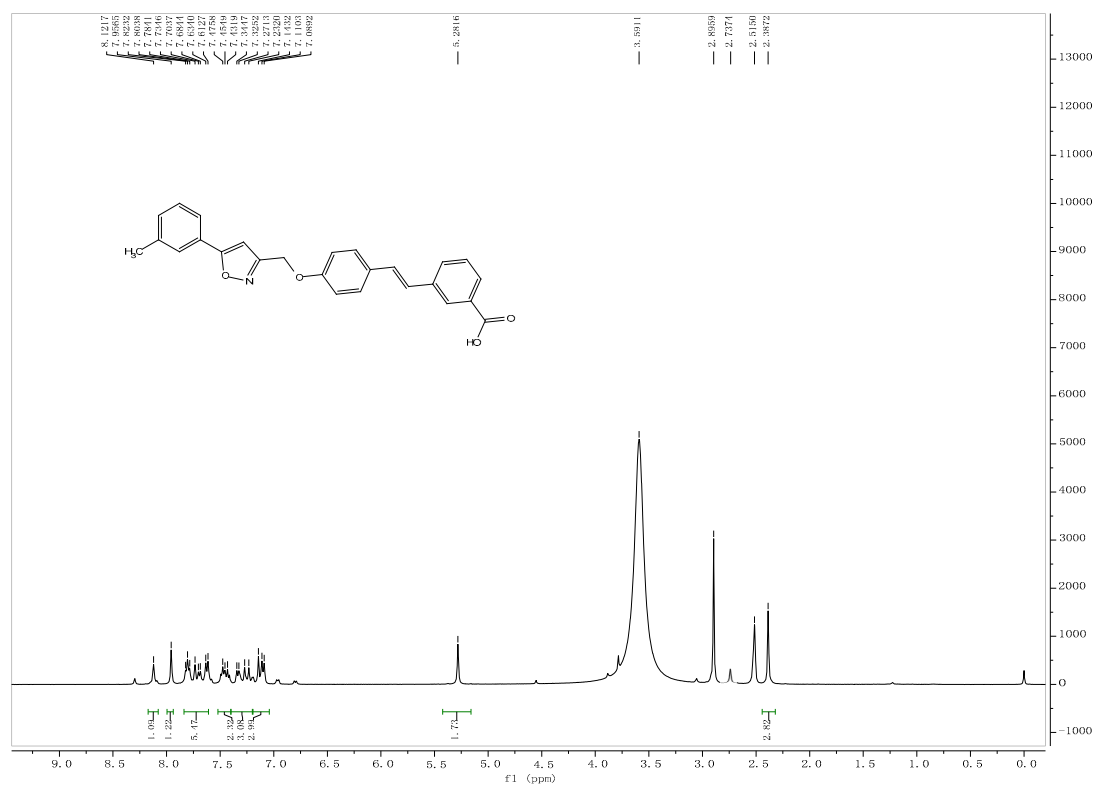Figure S15. <sup>1</sup>H-NMR spectrum of compound 24.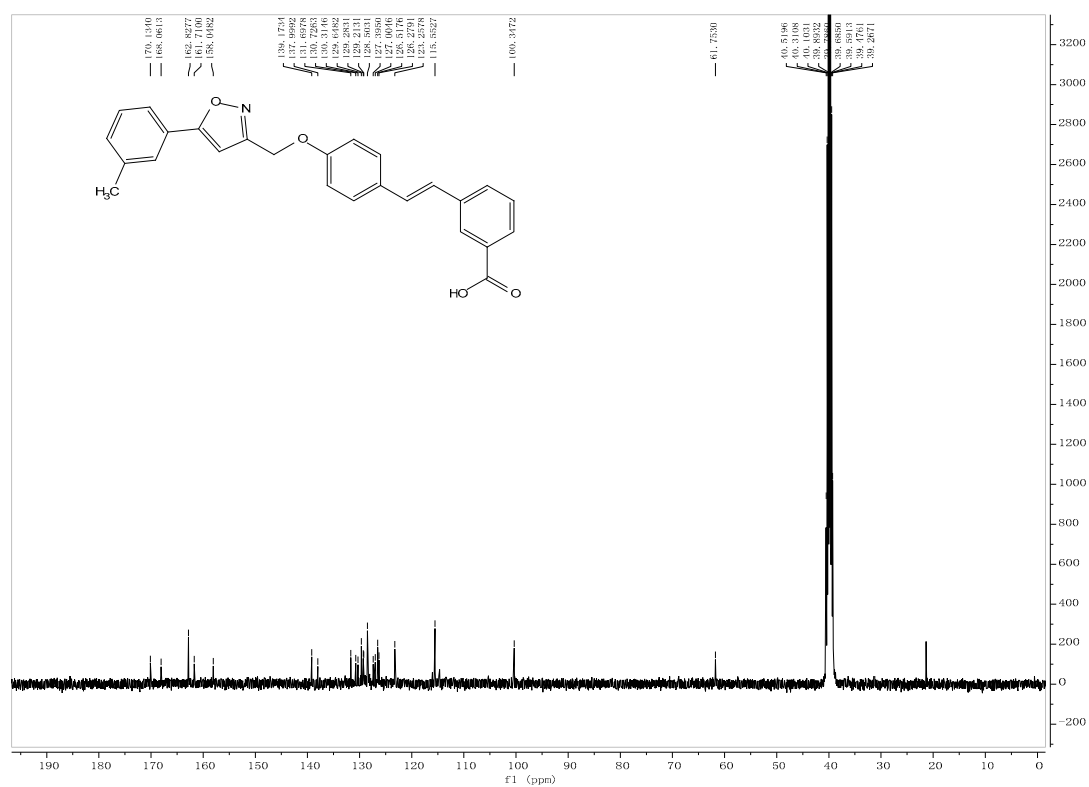Figure S16. <sup>13</sup>C-NMR spectrum of compound 24.



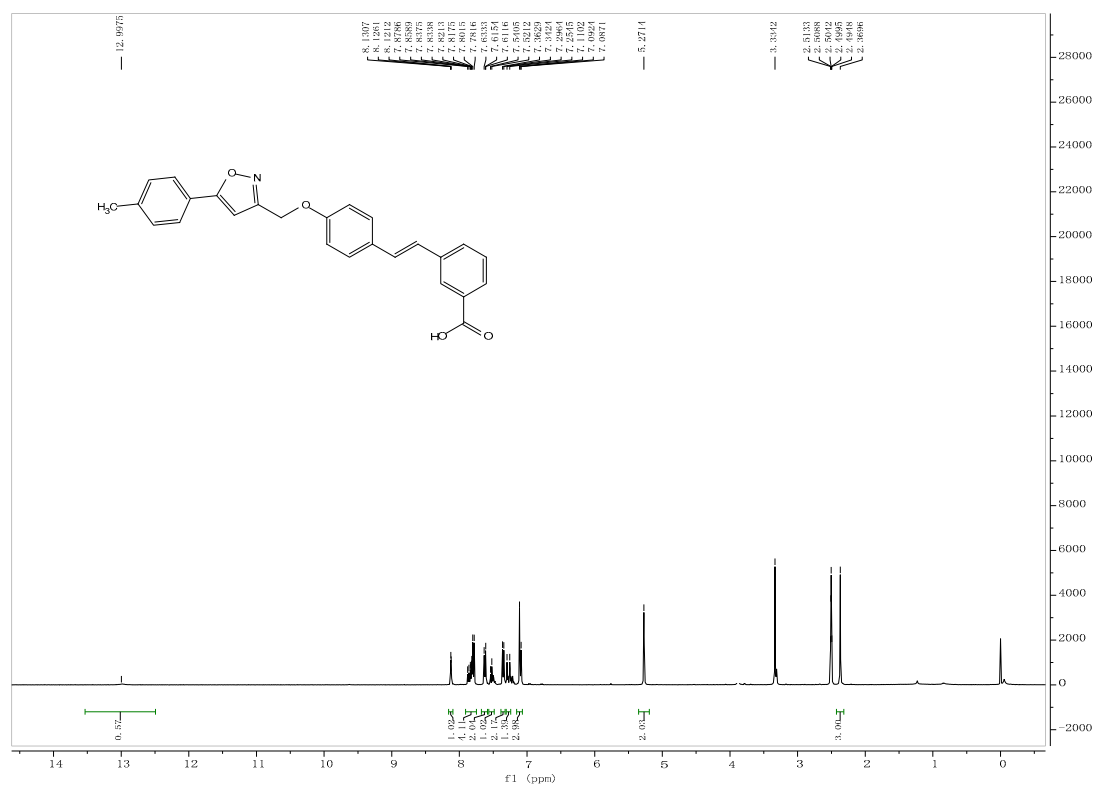Figure S17. <sup>1</sup>H-NMR spectrum of compound 26.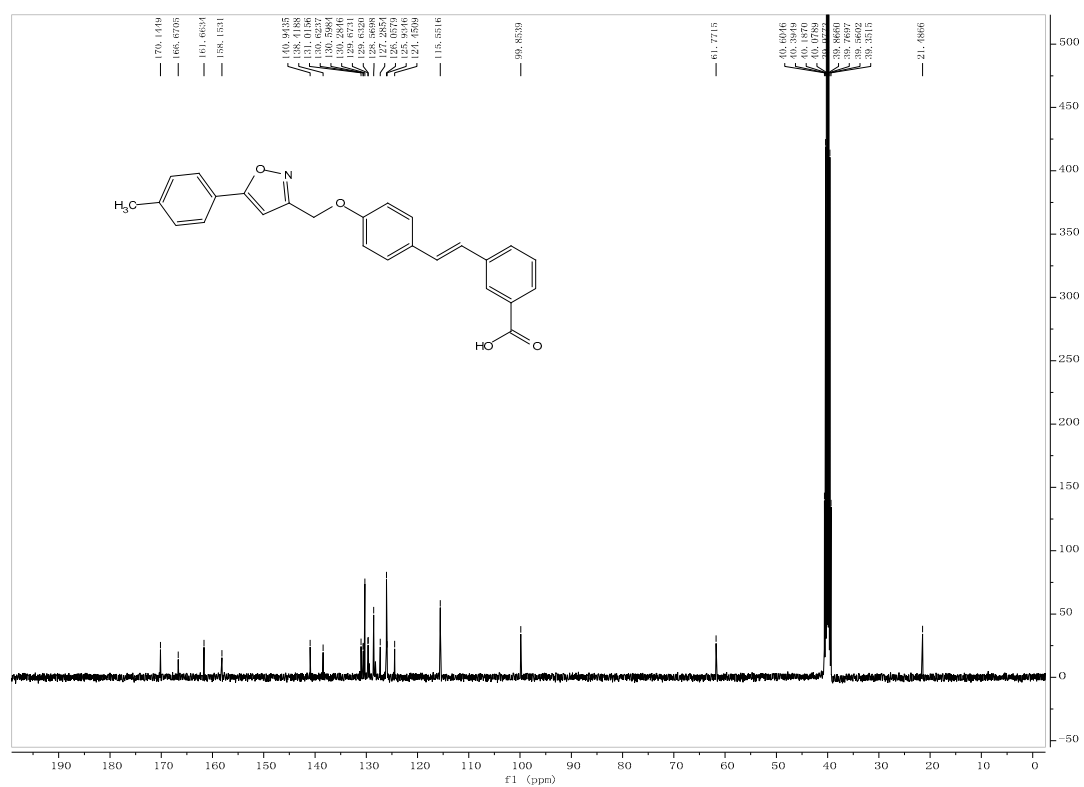Figure S18. <sup>13</sup>C-NMR spectrum of compound 26.

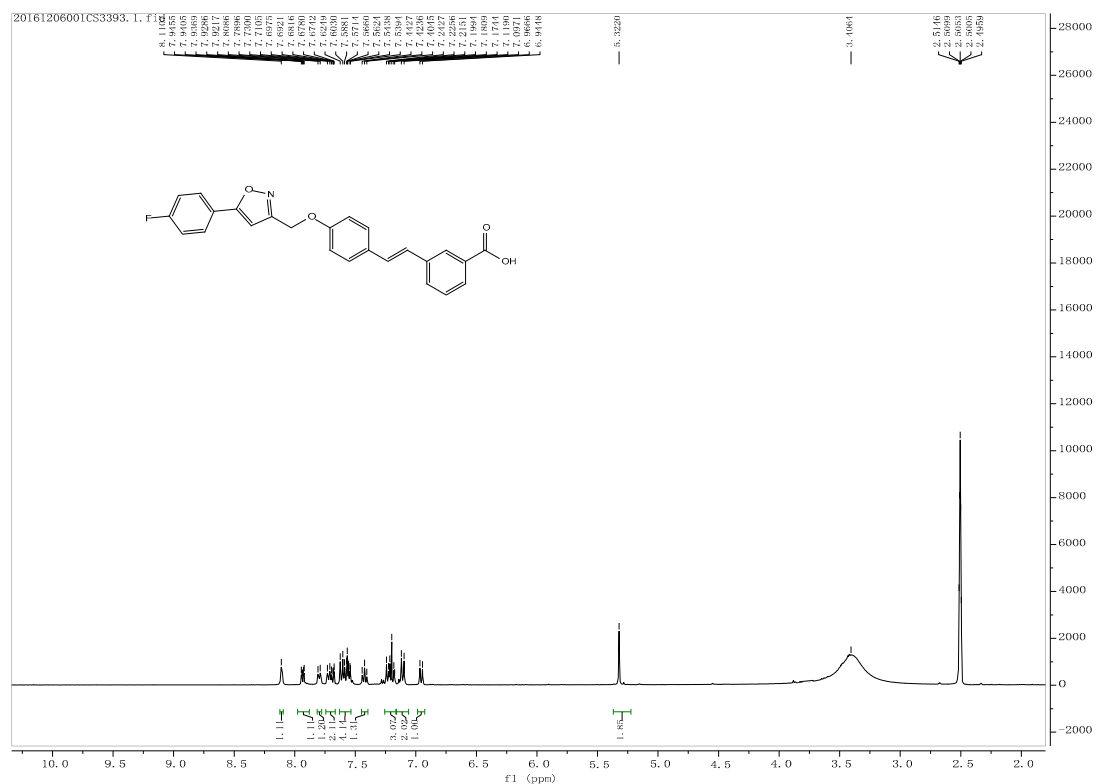Figure S19. <sup>1</sup>H-NMR spectrum of compound 28.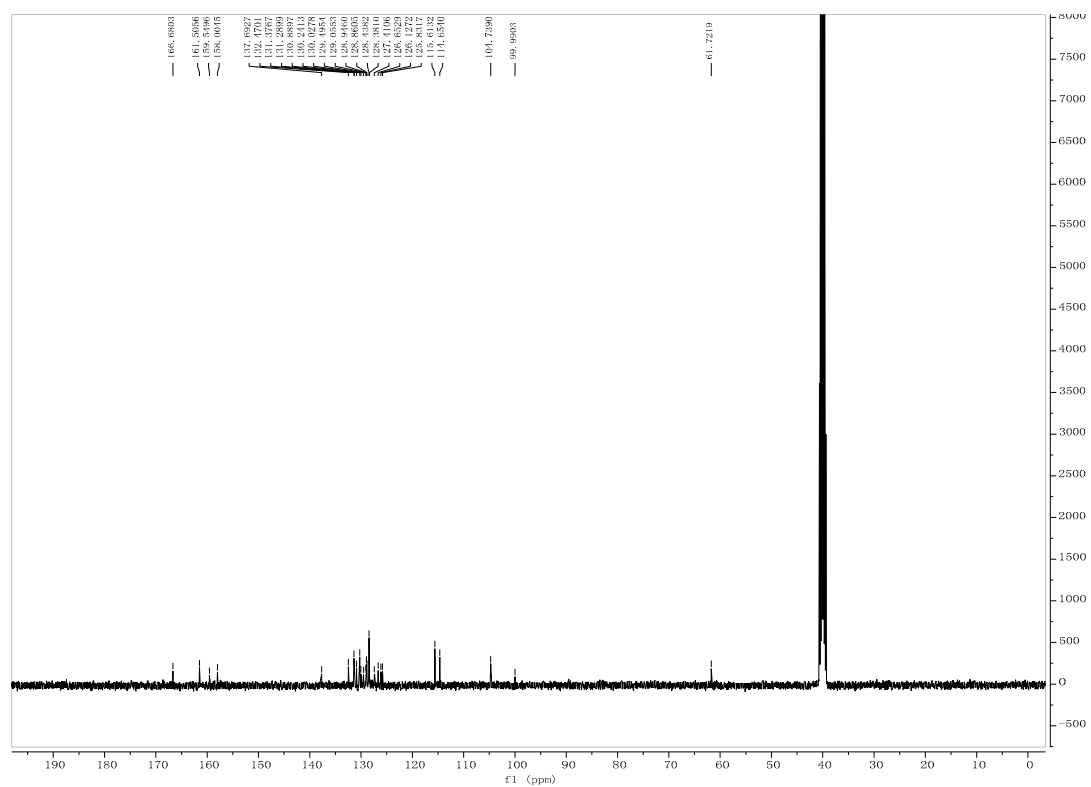Figure S20. <sup>13</sup>C-NMR spectrum of compound 28.

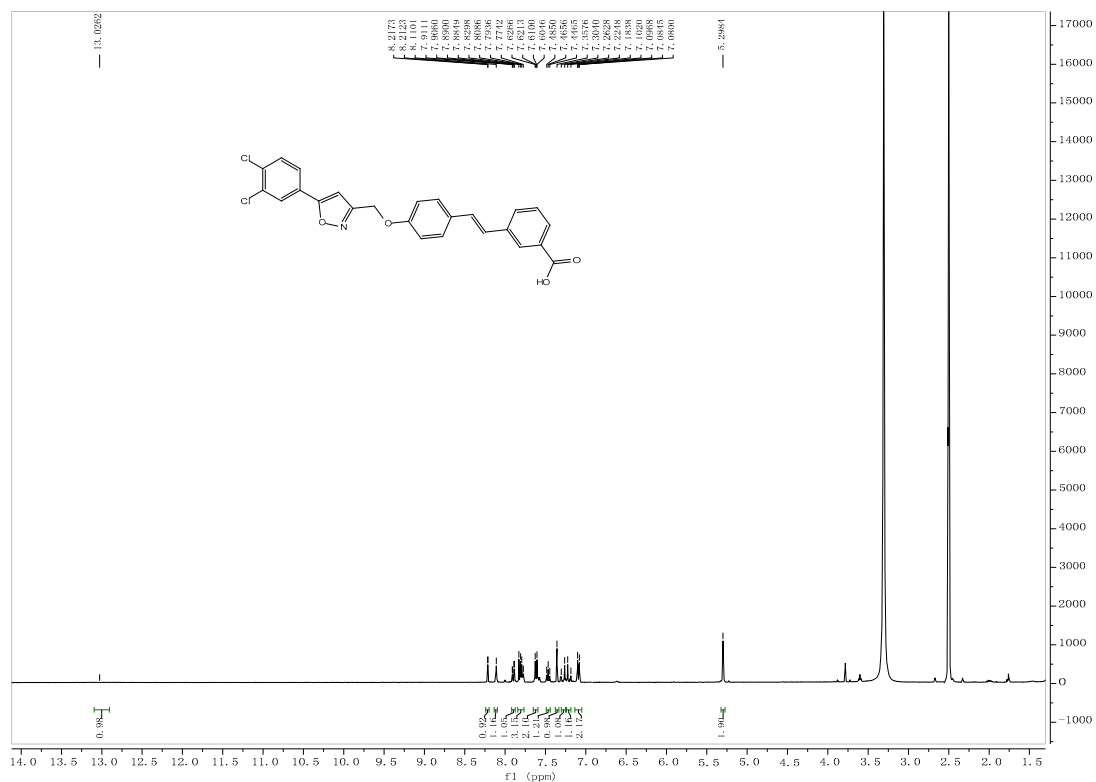Figure S21. <sup>1</sup>H-NMR spectrum of compound 29.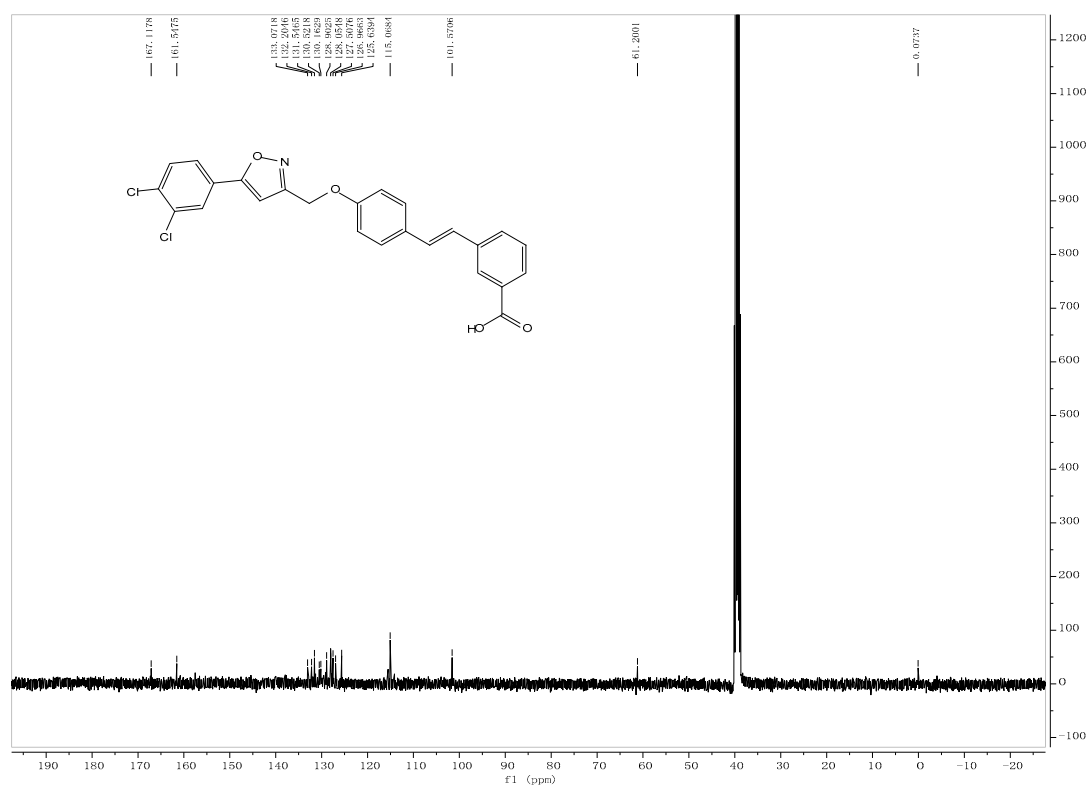Figure S22. <sup>13</sup>C-NMR spectrum of compound 29.

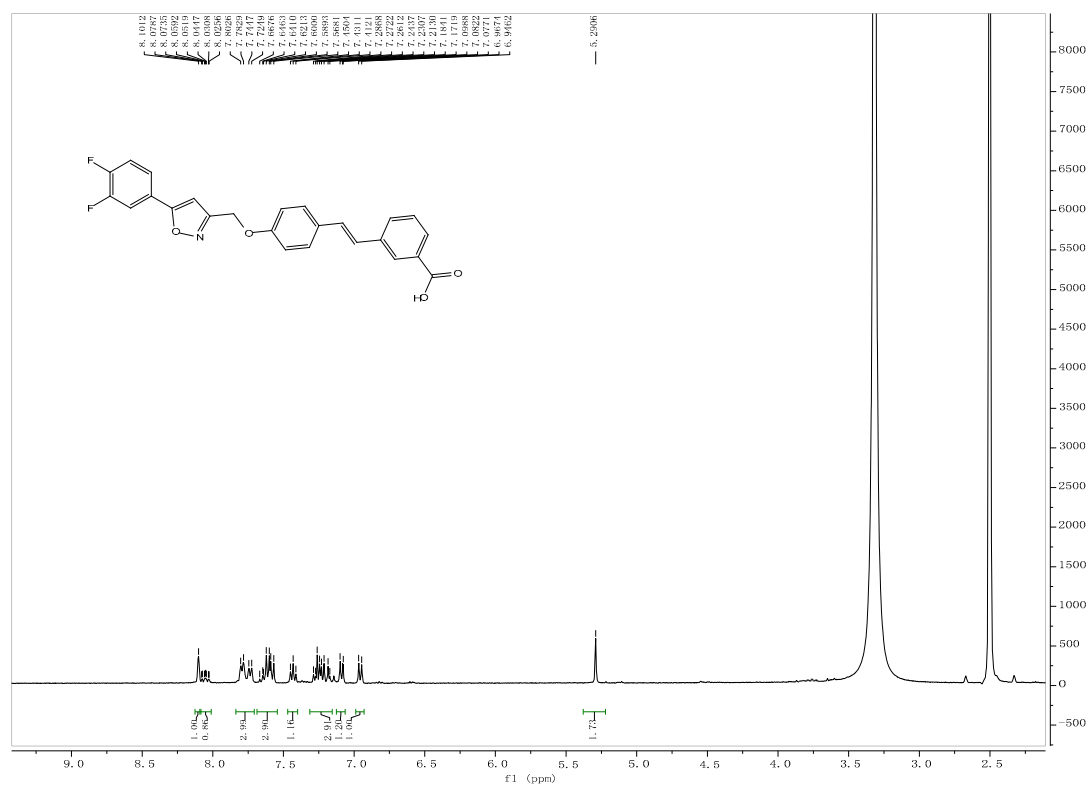Figure S23. <sup>1</sup>H-NMR spectrum of compound 30.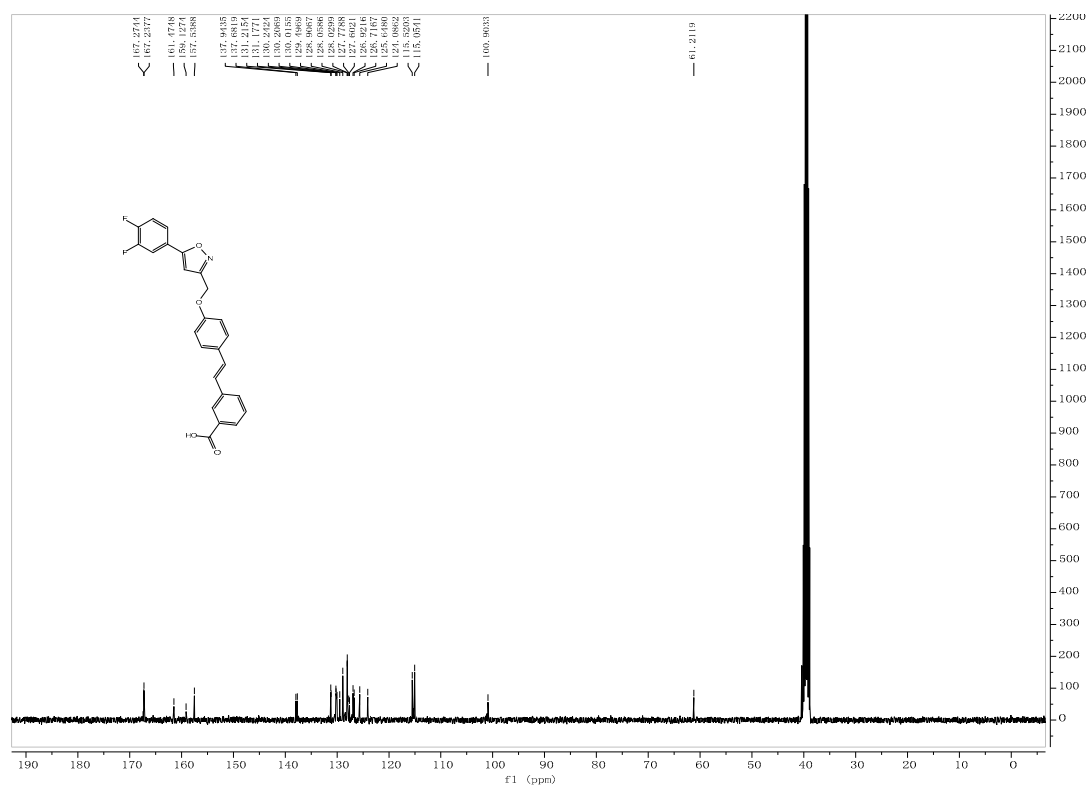Figure S24. <sup>13</sup>C-NMR spectrum of compound 30.
